# Supplementary material
Source: PubMed Central journal article supplement (PMC3828051)
Supplement: NIHMS487308-supplement-supplement_1.pdf [file NIHMS487308-supplement-supplement_1.pdf]

## SUPPLEMENTAL TABLE 1

Mean ( $\pm$ SD) and group comparisons for demographic and sexual function variables, normal women and women with hypoactive sexual desire disorder (HSDD).

|                     | Normal        | HSDD           | T value           |
|---------------------|---------------|----------------|-------------------|
| Years of age        | 29 (4.43)     | 37.1 (7.37)    | 2.42 <sup>a</sup> |
| Level of education  | 4.17 (0.98)   | 4.89 (0.93)    | 1.44              |
| Subjective arousal  | 15.17 (2.86)  | 9.33 (3.39)    | 3.46 <sup>b</sup> |
| Physiologic arousal | 8.83 (2.68)   | 6.22 (1.47)    | 2.16 <sup>a</sup> |
| Desire              | 21.17 (2.40)  | 12.6 (2.76)    | 6.30 <sup>c</sup> |
| FSQ total           | 132.17 (6.80) | 103.25 (22.05) | 2.54              |
| Distress            | 3 (5.61)      | 25.3 (7.66)    | 5.74 <sup>c</sup> |

Note: Level of education is consistent with "some college." For FSQ total, unequal variances.

<sup>a</sup>  $P \leq .05$ .

<sup>b</sup>  $P \leq .01$ .

<sup>c</sup>  $P \leq .001$ .

Woodard. Brain activation and sexual function. *Fertil Steril* 2013.

## SUPPLEMENTAL TABLE 2

## Areas of significant activation in women with normal sexual function during viewing of sexually explicit videos.

| Hemi  | x   | y   | z  | SPM (Z) | Nvox | Location                 | BA |
|-------|-----|-----|----|---------|------|--------------------------|----|
| Right | 14  | -70 | -8 | 4.23    | 160  | Lingual gyrus            | 18 |
|       | 34  | 1   | -2 | 3.66    | 234  | Clastrum                 |    |
|       | 38  | -1  | 10 | 3.27    | 234  | Insula                   | 13 |
|       | 48  | -33 | 34 | 3.51    | 42   | Inferior parietal lobule | 40 |
|       | 17  | -11 | 5  | 3.31    | 10   | Thalamus (VLN)           |    |
|       | 49  | -31 | 17 | 3.24    | 42   | Superior temporal gyrus  | 41 |
| Left  | 43  | -8  | 8  | 3.14    | 8    | Insula                   | 13 |
|       | -3  | -64 | 2  | 3.75    | 160  | Culmen of vermis         |    |
|       | 1   | -67 | -4 | 3.62    | 160  | Culmen of vermis         |    |
|       | -12 | -37 | -5 | 3.54    | 66   | Parahippocampal gyrus    | 30 |
|       | -36 | -1  | 0  | 3.43    | 117  | Clastrum                 |    |
|       | -34 | -29 | -8 | 3.25    | 13   | Hippocampus              |    |
|       | -55 | -37 | 21 | 3.05    | 73   | Insula                   | 13 |
|       | -48 | -3  | 41 | 3.01    | 85   | Precentral gyrus         | 6  |

Note: SPM = Statistical Parametric Mapping.

Woodard. Brain activation and sexual function. *Fertil Steril* 2013.

## SUPPLEMENTAL TABLE 3

Areas of significant activation in women with hypoactive sexual desire disorder (HSDD) during viewing of sexually explicit videos.

| Hemi  | x   | y   | z   | SPM (Z) | Nvox | Location               | BA |
|-------|-----|-----|-----|---------|------|------------------------|----|
| Right | 10  | -23 | 9   | 4.07    | 1576 | Thalamus (P)           |    |
|       | 10  | 46  | 12  | 3.24    | 587  | Medial frontal gyrus   | 10 |
|       | 27  | -61 | -24 | 3.66    | 397  | Culmen                 |    |
|       | 51  | -60 | 1   | 3.45    | 228  | Middle temporal gyrus  | 37 |
|       | 45  | -64 | -14 | 3.28    |      | Fusiform gyrus         | 37 |
| Left  | 1   | -19 | 6   | 4.73    | 1576 | Thalamus (MDN)         |    |
|       | -18 | -13 | 21  | 4.48    |      | Caudate body           |    |
|       | -23 | -71 | -23 | 4.44    | 946  | Declive                |    |
|       | 1   | -81 | -12 | 3.42    |      | Declive                |    |
|       | -25 | -53 | -25 | 3.41    |      | Culmen                 |    |
|       | 0   | -75 | 44  | 4.06    | 264  | Precuneus              | 7  |
|       | 0   | -60 | 42  | 3.13    |      | Precuneus              | 7  |
|       | -42 | -52 | -23 | 4.02    | 40   | Culmen                 |    |
|       | -1  | 21  | 24  | 3.93    | 587  | Anterior cingulate     | 24 |
|       | -3  | 44  | 17  | 3.52    |      | Medial frontal gyrus   | 9  |
|       | -27 | 2   | -10 | 3.46    | 22   | Amygdala               |    |
|       | -37 | -85 | 6   | 3.45    | 53   | Middle occipital gyrus | 19 |

Woodard. Brain activation and sexual function. *Fertil Steril* 2013.

## SUPPLEMENTAL TABLE 4

Areas of greater activation in women with normal sexual function compared with women with hypoactive sexual desire disorder (HSDD) during viewing of sexually explicit videos (controlled for age).

| Hemi  | x   | y   | z  | SPM (Z) | Nvox | Location               | BA |
|-------|-----|-----|----|---------|------|------------------------|----|
| Right | 14  | -11 | 2  | 3.36    | 71   | Thalamus               |    |
| Left  | -57 | -33 | 22 | 3.43    | 56   | Insula                 | 13 |
|       | -36 | -69 | -1 | 3.37    | 65   | Middle occipital gyrus | 37 |
|       | -50 | -5  | 37 | 3.29    | 602  | Precentral gyrus       | 6  |
|       | -53 | 9   | 26 | 3.18    |      | Inferior frontal gyrus | 9  |
|       | -49 | 4   | 20 | 3.13    |      | Inferior frontal gyrus | 44 |
|       | -15 | -46 | 37 | 3.21    | 45   | Precuneus              | 31 |
|       | -14 | -39 | -3 | 3.00    | 33   | Parahippocampal gyrus  | 30 |
|       | -48 | -72 | 8  | 2.97    | 18   | Middle occipital gyrus | 19 |
|       | -44 | -42 | 34 | 2.97    | 32   | Supramarginal gyrus    | 40 |

Woodard. Brain activation and sexual function. *Fertil Steril* 2013.

## SUPPLEMENTAL TABLE 5

Areas of greater activation in women with hypoactive sexual desire disorder (HSDD) compared with women with normal sexual function during viewing of sexually explicit videos (controlled for age).

| Hemi  | x   | y   | z  | SPM (Z) | Nvox | Location             | BA |
|-------|-----|-----|----|---------|------|----------------------|----|
| Right | 6   | 45  | 28 | 3.72    | 116  | Medial frontal gyrus | 9  |
| Left  | -18 | -71 | 39 | 3.30    | 50   | Precuneus            | 7  |

Woodard. Brain activation and sexual function. *Fertil Steril* 2013.
